# Supplementary material
Source: PubMed Central journal article supplement (PMC2965825)

**A**

Tuj1

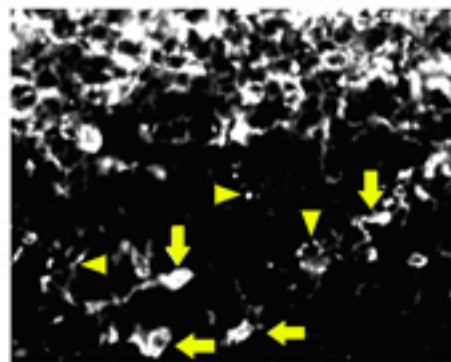

GABA

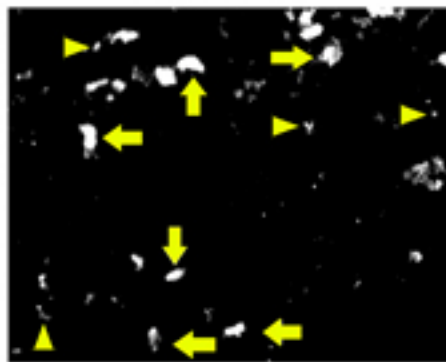

Tuj1/GABA

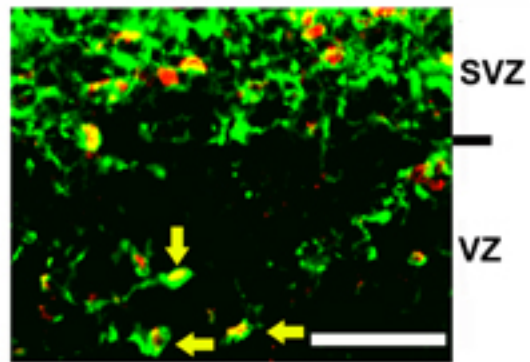**B**

Tuj1

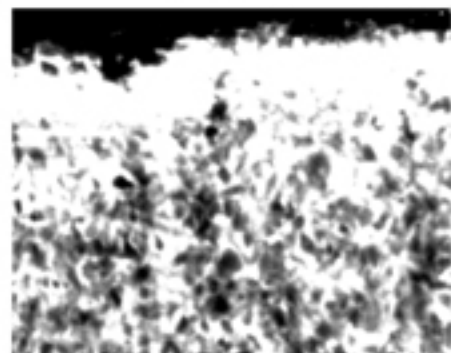

Glutamate

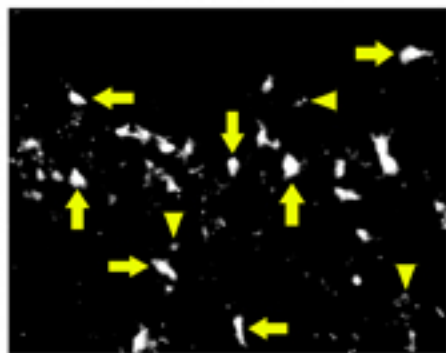

Tuj1/Glutamate

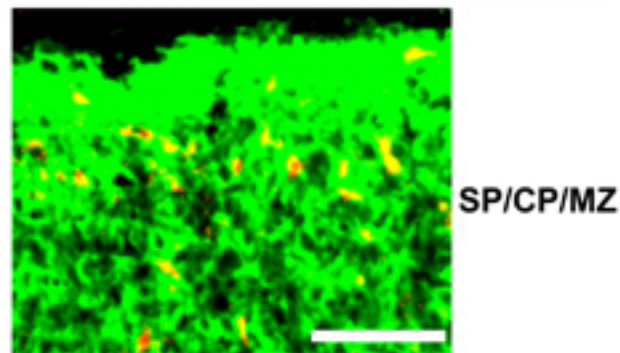

Supplement: NIHMS236708-supplement-1.pdf [file NIHMS236708-supplement-1.pdf]
